# Supplementary material for: National Trends in Emergency Department Care Processes for Acute Myocardial Infarction in the United States, 2005 to 2015
Source: PubMed Central journal article supplement — J Am Heart Assoc. 2020 Oct 13;9(20):e017208. doi: 10.1161/JAHA.120.017208 (PMC7763391; doi:10.1161/jaha.120.017208), 2020-10-13
Supplement: JAH3-9-e017208-s001.pdf [file JAH3-9-e017208-s001.pdf]

# **SUPPLEMENTAL MATERIAL**

**Table S1. Patient characteristics and outcomes, all AMI.**

|                                             | <b>2005-2007</b> | <b>2008-2010</b> | <b>2011-2013</b> | <b>2014-2015</b> |
|---------------------------------------------|------------------|------------------|------------------|------------------|
| <u>Estimated # of visits</u>                | 1493145          | 1404238          | 919455           | 581924           |
| <u>Demographic characteristics, No. (%)</u> |                  |                  |                  |                  |
| Age, mean (SE), y                           | 65 (1.1)         | 63.8 (1.0)       | 66.2 (1.5)       | 70.4 (1.9)       |
| Male                                        | 849676 (56.9)    | 802190 (57.1)    | 535825 (58.3)    | 319523 (54.9)    |
| White                                       | 1198741 (80.3)   | 1008614 (71.8)   | 665520 (72.4)    | 438026 (75.3)    |
| Black                                       | 172776 (11.6)    | 172558 (12.3)    | 143107 (15.6)    | 92579 (15.9)     |
| Hispanic                                    | 89061 (6.0)      | 147346 (10.5)    | 89594 (9.7)      | 51319 (8.8)      |
| Other race                                  | 32567 (2.2)      | 75720 (5.4)      | 21234 (2.3)      | 0 (0.0)          |
| <u>Outcomes, % (SE)</u>                     |                  |                  |                  |                  |
| ED LOS, median (IQR), min                   | 195 (122, 314)   | 222 (110, 346)   | 172 (83, 304)    | 196 (138, 280)   |
| Admitted                                    | 67.6 (3.2)       | 74.1 (3.5)       | 70.3 (4.4)       | 71.2 (5.8)       |
| Admission to critical care unit             | 34.2 (4.1)       | 31.9 (3.8)       | 33.0 (5.3)       | 31.2 (7.8)       |
| Admission to cardiac catheterization lab    | 13.5 (2.9)       | 20.6 (3.8)       | 28.1 (5.5)       | 28.4 (6.0)       |
| Transferred                                 | 19.0 (3.0)       | 15.3 (3.0)       | 22.1 (4.3)       | 15.5 (4.3)       |
| Non-aspirin antiplatelet agents             | 9.9 (1.9)        | 15.1 (3.0)       | 13.5 (2.7)       | 18.4 (5.4)       |
| Intravenous antithrombotic agents           | 23.0 (2.5)       | 29.5 (3.8)       | 27.9 (4.0)       | 25.7 (5.4)       |
| Fibrinolytic agents                         | 2.0 (1.0)        | 1.6 (1.2)        | 2.8 (1.3)        | 2.7 (1.6)        |
| Glycoprotein IIb/IIIa inhibitors            | 4.9 (1.1)        | 4.1 (1.4)        | 4.3 (2.1)        | 3.1 (1.9)        |

**Table S2. Patient characteristics and outcomes, STEMI patients who arrived by EMS.**

|                                             | <b>2005-2007</b> | <b>2008-2010</b> | <b>2011-2013</b> | <b>2014-2015</b> |
|---------------------------------------------|------------------|------------------|------------------|------------------|
| <u>Estimated # of visits</u>                | 552971           | 469944           | 318506           | 165960           |
| <u>Demographic characteristics, No. (%)</u> |                  |                  |                  |                  |
| Age, mean (SE), y                           | 68.9 (1.5)       | 66.8 (1.6)       | 69.1 (2.8)       | 70.5 (3.0)       |
| Male                                        | 305885 (55.3)    | 267593 (56.9)    | 198221 (62.23)   | 89778 (54.1)     |
| White                                       | 449260 (81.2)    | 308511 (65.7)    | 254681 (80.0)    | 145805 (87.9)    |
| Black                                       | 63438 (11.47)    | 44264 (9.42)     | 23515 (7.4)      | 12428 (7.5)      |
| Hispanic                                    | 33869 (6.1)      | 89722 (19.1)     | 37403 (11.74)    | 7727 (4.66)      |
| Other race                                  | 6404 (1.2)       | 27447 (5.8)      | 2907 (0.9)       | 0.0 (0.0)        |
| <u>Outcomes, % (SE)</u>                     |                  |                  |                  |                  |
| ED LOS, median (IQR), min                   | 195 (106, 317)   | 183 (71, 302)    | 185 (71, 339)    | 94 (40, 260)     |
| Admitted                                    | 74.5 (5.0)       | 79.2 (5.0)       | 88.1 (4.1)       | 72.6 (9.8)       |
| Admission to critical care unit             | 39.4 (6.0)       | 38.2 (6.4)       | 28.7 (7.7)       | 29.0 (8.5)       |
| Admission to cardiac catheterization lab    | 12.4 (4.0)       | 22.2 (6.1)       | 43.7 (9.4)       | 56.3 (9.4)       |
| Transferred                                 | 16.8 (4.3)       | 11.8 (3.6)       | 8.4 (3.6)        | 12.2 (7.6)       |
| Non-aspirin antiplatelet agents             | 12.5 (3.2)       | 17.3 (4.6)       | 18.3 (5.5)       | 22.8 (9.5)       |
| Intravenous antithrombotic agents           | 29.0 (4.7)       | 29.0 (5.0)       | 28.7 (6.3)       | 29.7 (10.3)      |
| Fibrinolytic agents                         | 2.9 (2)          | 1.3 (1.1)        | 3.5 (2.8)        | 0.0 (0.0)        |
| Glycoprotein IIb/IIIa inhibitors            | 6.8 (2.5)        | 4.4 (3.4)        | 5.7 (4)          | 5.9 (4.5)        |

**Table S3. Patient characteristics and outcomes, NSTEMI.**

|                                             | <b>2005-2007</b> | <b>2008-2010</b> | <b>2011-2013</b> | <b>2014-2015</b> |
|---------------------------------------------|------------------|------------------|------------------|------------------|
| <u>Estimated # of visits</u>                | 90377            | 212148           | 224961           | 266111           |
| <u>Demographic characteristics, No. (%)</u> |                  |                  |                  |                  |
| Age, mean (SE), y                           | 66.7 (6.0)       | 65.5 (1.6)       | 69.4 (2.4)       | 73 (3.0)         |
| Male                                        | 51711 (57.2)     | 120827 (57.0)    | 99680 (44.3)     | 169574 (63.7)    |
| White                                       | 77675 (86.0)     | 118533 (55.9)    | 142011 (63.1)    | 158540 (59.6)    |
| Black                                       | 8442 (9.3)       | 55862 (26.3)     | 43529 (19.4)     | 71760 (27.0)     |
| Hispanic                                    | 4260 (4.7)       | 11365 (5.4)      | 28445 (12.6)     | 35811 (13.5)     |
| Other race                                  | 0 (0.0)          | 26388 (12.4)     | 10976 (4.9)      | 0 (0.0)          |
| <u>Outcomes, % (SE)</u>                     |                  |                  |                  |                  |
| ED LOS, median (IQR), min                   | 174 (125, 297)   | 270 (193, 397)   | 225 (134, 333)   | 235 (192, 367)   |
| Admitted                                    | 87.8 (6.8)       | 83.7 (6.7)       | 74.3 (10.1)      | 89.3 (4.8)       |
| Admission to critical care unit             | 35.8 (14.0)      | 24.1 (7.8)       | 36.1 (10.4)      | 24.0 (11.2)      |
| Admission to cardiac catheterization lab    | 33.7 (16.2)      | 8.2 (5.5)        | 4.7 (3.1)        | 20.8 (8.1)       |
| Transferred                                 | 7.5 (5.4)        | 17.8 (6.7)       | 25.7 (10.0)      | 4.9 (3.4)        |
| Non-aspirin antiplatelet agents             | 0.0 (0.0)        | 23.6 (9.7)       | 14.8 (6.7)       | 8.6 (5.0)        |
| Intravenous antithrombotic agents           | 21.6 (13.9)      | 33.5 (9.6)       | 20.8 (6.2)       | 19.9 (6.9)       |
| Fibrinolytic agents                         | 0.0 (0.0)        | 0.0 (0.0)        | 0.0 (0.0)        | 0.0 (0.0)        |
| Glycoprotein IIb/IIIa inhibitors            | 2.7 (2.7)        | 7.1 (4.3)        | 7.5 (6.1)        | 0.0 (0.0)        |
